# Supplementary material for: Using a meta-narrative literature review and focus groups with key stakeholders to identify perceived challenges and solutions for generating robust evidence on the effectiveness of treatments for rare diseases
Source: Orphanet J Rare Dis. 2018 Jun 28;13:104. doi: 10.1186/s13023-018-0851-1 (PMC6022712; doi:10.1186/s13023-018-0851-1)
Supplement: Supplementary file 2 — List of articles included in meta-narrative literature review. (XLSX 53 kb) [file 13023_2018_851_MOESM2_ESM.xlsx]

## Sheet: Included Studies (n-60)
Authors	Year	Title	Journal	Abstract
P. B. Shieh	2015	Duchenne muscular dystrophy: clinical trials and emerging tribulations	Current Opinion in Neurology	PURPOSE OF REVIEW: This article reviewed the most recent clinical trials investigating potential treatments for Duchenne muscular dystrophy (DMD). In the development of these studies, investigators have encountered unexpected challenges that reveal limitations in our understanding of the clinical trial design for this disease. RECENT FINDINGS: Recent clinical trials for DMD have revealed limitati…
B. C. Stunnenberg, W. Woertman, J. Raaphorst, J. M. Statland, R. C. Griggs, J. Timmermans, C. G. Saris, B. J. Schouwenberg, H. M. Groenewoud, D. F. Stegeman, B. G. van Engelen, G. Drost and G. J. van der Wilt	2015	Combined N-of-1 trials to investigate mexiletine in non-dystrophic myotonia using a Bayesian approach; study rationale and protocol	BMC Neurology	BACKGROUND: To obtain evidence for the clinical and cost-effectiveness of treatments for patients with rare diseases is a challenge. Non-dystrophic myotonia (NDM) is a group of inherited, rare muscle diseases characterized by muscle stiffness. The reimbursement of mexiletine, the expert opinion drug for NDM, has been discontinued in some countries due to a lack of independent randomized controlle…
L. V. Hampson, J. Whitehead, D. Eleftheriou, C. Tudur-Smith, R. Jones, D. Jayne, H. Hickey, M. W. Beresford, C. Bracaglia, A. Caldas, R. Cimaz, J. Dehoorne, P. Dolezalova, M. Friswell, M. Jelusic, S. D. Marks, N. Martin, A. M. McMahon, J. Peitz, A. van Royen-Kerkhof, O. Soylemezoglu and P. A. Brogan	2015	Elicitation of expert prior opinion: application to the MYPAN trial in childhood polyarteritis nodosa	PLoS ONE [Electronic Resource]	OBJECTIVES: Definitive sample sizes for clinical trials in rare diseases are usually infeasible. Bayesian methodology can be used to maximise what is learnt from clinical trials in these circumstances. We elicited expert prior opinion for a future Bayesian randomised controlled trial for a rare inflammatory paediatric disease, polyarteritis nodosa (MYPAN, Mycophenolate mofetil for polyarteritis n…
P. Nony, P. Kurbatova, A. Bajard, S. Malik, C. Castellan, S. Chabaud, V. Volpert, N. Eymard, B. Kassai, C. Cornu, Cresim and C. Epi	2014	A methodological framework for drug development in rare diseases	Orphanet Journal Of Rare Diseases	INTRODUCTION: Developing orphan drugs is challenging because of their severity and the requisite for effective drugs. The small number of patients does not allow conducting adequately powered randomized controlled trials (RCTs). There is a need to develop high quality, ethically investigated, and appropriately authorized medicines, without subjecting patients to unnecessary trials. AIMS AND OBJEC…
K. Facey, A. Granados, G. Guyatt, A. Kent, N. Shah, G. J. van der Wilt and D. Wong-Rieger	2014	Generating health technology assessment evidence for rare diseases	International Journal of Technology Assessment in Health Care	OBJECTIVES: Rare diseases are often heterogeneous in their progression and response to treatment, with only a small population for study. This provides challenges for evidence generation to support HTA, so novel research methods are required. METHODS: Discussion with an expert panel was augmented with references and case studies to explore robust approaches for HTA evidence generation for rare di…
J. J. Gagne, L. Thompson, K. O'Keefe and A. S. Kesselheim	2014	Innovative research methods for studying treatments for rare diseases: methodological review	BMJ	OBJECTIVE: To examine methods for generating evidence on health outcomes in patients with rare diseases. DESIGN: Methodological review of existing literature. SETTING: PubMed, Embase, and Academic Search Premier searched for articles describing innovative approaches to randomized trial design and analysis methods and methods for conducting observational research in patients with rare diseases. MA…
L. V. Hampson, J. Whitehead, D. Eleftheriou and P. Brogan	2014	Bayesian methods for the design and interpretation of clinical trials in very rare diseases	Statistics in Medicine	This paper considers the design and interpretation of clinical trials comparing treatments for conditions so rare that worldwide recruitment efforts are likely to yield total sample sizes of 50 or fewer, even when patients are recruited over several years. For such studies, the sample size needed to meet a conventional frequentist power requirement is clearly infeasible. Rather, the expectation o…
W. Hu, J. Cai and D. Zeng	2014	Sample size/power calculation for stratified case-cohort design	Statistics in Medicine	The case-cohort (CC) study design usually has been used for risk factor assessment in epidemiologic studies or disease prevention trials for rare diseases. The sample size/power calculation for a stratified CC (SCC) design has not been addressed before. This article derives such result based on a stratified test statistic. Simulation studies show that the proposed test for the SCC design utilizin…
D. Bolignano, E. V. Nagler, W. Van Biesen and C. Zoccali	2014	Providing guidance in the dark: rare renal diseases and the challenge to improve the quality of evidence	Nephrology Dialysis Transplantation	Among renal diseases, over 100 conditions meet the epidemiological criteria to be defined as rare, including disorders in development, transport and metabolism. Clinical management of rare diseases is likely to be less investigated than that of common disorders and for this reason the scientific evidence to support clinical practice is limited. Furthermore, no specific and validated methods for d…
J. P. Krischer, R. Gopal-Srivastava, S. C. Groft, D. J. Eckstein and N. Rare Diseases Clinical Research	2014	The Rare Diseases Clinical Research Network's organization and approach to observational research and health outcomes research	Journal of General Internal Medicine	Established in 2003 by the Office of Rare Diseases Research (ORDR), in collaboration with several National Institutes of Health (NIH) Institutes/Centers, the Rare Diseases Clinical Research Network (RDCRN) consists of multiple clinical consortia conducting research in more than 200 rare diseases. The RDCRN supports longitudinal or natural history, pilot, Phase I, II, and III, case-control, cross-…
E. Basch and A. V. Bennett	2014	Patient-reported outcomes in clinical trials of rare diseases	Journal of General Internal Medicine	The science of measuring patient-reported outcomes (PROs) has advanced substantially in recent decades, allowing evaluation of how patients feel and function in clinical research. Assessment of the patient experience in populations with rare diseases can be successfully achieved using PRO measures when careful planning and rigorous methods are employed. A number of challenges exist when designing…
B. Huang, E. H. Giannini, D. J. Lovell, L. Ding, Y. Liu and P. J. Hashkes	2014	Enhancing crossover trial design for rare diseases: limiting ineffective exposure and increasing study power by enabling patient choice to escape early	Contemporary Clinical Trials	BACKGROUND: Addressing the two most important considerations in designing clinical trials, i.e. maximizing study power and minimizing patient exposure to ineffective treatment, is particularly challenging for trials of rare diseases. The familial Mediterranean fever (FMF) rilonacept trial (Hashkes et al., Ann Intern Med 2012;157:533-41) demonstrates a novel crossover design by enabling patient ch…
C. Tudur Smith, P. R. Williamson and M. W. Beresford	2014	Methodology of clinical trials for rare diseases	Best Practice & Research in Clinical Rheumatology	Evidence from clinical trials, ideally using randomisation and allocation concealment, is essential for informing clinical decisions regarding the benefits and harms of treatments for patients. Where diseases are rare, such as in paediatric rheumatic diseases, patient recruitment into clinical trials can be a major obstacle, leading to an absence of evidence and patients receiving treatments base…
K. Fischer, R. Ljung, H. Platokouki, R. Liesner, S. Claeyssens, E. Smink and H. M. van den Berg	2014	Prospective observational cohort studies for studying rare diseases: the European PedNet Haemophilia Registry	Haemophilia	Haemophilia is a rare disease. To improve knowledge, prospective studies of large numbers of subjects are needed. To establish a large well-documented birth cohort of patients with haemophilia enabling studies on early presentation, side effects and outcome of treatment. Twenty-one haemophilia treatment centres have been collecting data on all children with haemophilia with FVIII/IX levels up to …
L. Abrahamyan, I. R. Diamond, S. R. Johnson and B. M. Feldman	2014	A new toolkit for conducting clinical trials in rare disorders	Journal of Population Therapeutics & Clinical Pharmacology	Evidence based medicine requires strong scientific evidence upon which to base treatment. Because the available study populations for rare diseases are small, this evidence is difficult to accrue. Investigators need to consider a flexible toolkit of methods to deal with the problems inherent in the study of rare disease. We present some potential solutions in this paper.
A. S. Kesselheim and J. J. Gagne	2014	Strategies for postmarketing surveillance of drugs for rare diseases	Clinical Pharmacology & Therapeutics	Rare diseases are an important part of the public health, affecting 6-8% of the population, and drugs intended for rare diseases comprise the fastest growing subcategory of new drug approvals in the United States. However, clinical study of therapeutics in these populations is limited by the low prevalence of these diseases, and the natural history or pathogenesis of the disease may be poorly des…
E. Picavet, D. Cassiman, W. Pinxten and S. Simoens	2013	Ethical, legal and social implications of rare diseases and orphan drugs in Europe: meeting report of a Brocher symposium	Expert Review of Pharmacoeconomics & Outcomes Research	Ethical, legal and social implications of rare diseases and orphan drugs in Europe (Brocher symposium) Geneva, Switzerland 18-19 April 2013 As part of the Scientific Program of the Fondation Brocher, a two-day symposium on orphan drugs and rare diseases was held on the shores of Lac Leman in Geneva. Specific focus was on the ethical, legal and social implications of rare diseases and orphan drugs…
E. F. Augustine, H. R. Adams and J. W. Mink	2013	Clinical trials in rare disease: challenges and opportunities	Journal of Child Neurology	The neuronal ceroid lipofuscinoses constitute one of many groups of rare childhood diseases for which disease-modifying treatments are nonexistent. Disease-specific barriers to therapeutic success include incomplete understanding of disease pathophysiology and limitations of treatments that cannot adequately cross the blood-brain barrier to access the central nervous system. Therapeutic developme…
J. P. Bai, J. S. Barrett, G. J. Burckart, B. Meibohm, H. C. Sachs and L. Yao	2013	Strategic biomarkers for drug development in treating rare diseases and diseases in neonates and infants	AAPS Journal	There are similar challenges in developing a product designed to treat patients with a rare disease and drugs to treat critically ill neonates and infants. Part of the challenge in developing such products as well as identifying the optimal dosing regimen for the treatment of young children arises from the complex interrelationship between developmental changes and changes in biomarkers responsiv…
M. Luisetti, I. M. Balfour-Lynn, S. R. Johnson, M. Miravitlles, C. Strange, B. C. Trapnell, H. van Bronswijk and C. Vogelmeier	2012	Perspectives for improving the evaluation and access of therapies for rare lung diseases in Europe	Respiratory Medicine	The approach to treating a rare disease is different to that taken for more common diseases. Small patient cohorts alter clinical trial design and limit enrollment, and the picture for rare lung diseases is further complicated by the fact that most are composed of a variety of clinical phenotypes. Since the outcome measures of lung impairment have considerable test-to-test variability, potential …
J. Armstrong-Wells and N. A. Goldenberg	2011	Institution-based prospective inception cohort studies in neonatal rare disease research	Seminars In Fetal & Neonatal Medicine	In rare diseases, wherein the conduct of randomized controlled clinical trials (RCTs) is challenging, cohort studies can offer important, and, in certain instances, high quality (e.g. the prospective inception cohort study) evidence on relationships among risk factors, treatments, and outcomes. The objective of this perspective article is to provide an overview of salient issues in the design and…
J. A. Cole, J. S. Taylor, T. N. Hangartner, N. J. Weinreb, P. K. Mistry and A. Khan	2011	Reducing selection bias in case-control studies from rare disease registries	Orphanet Journal Of Rare Diseases	BACKGROUND: In clinical research of rare diseases, where small patient numbers and disease heterogeneity limit study design options, registries are a valuable resource for demographic and outcome information. However, in contrast to prospective, randomized clinical trials, the observational design of registries is prone to introduce selection bias and negatively impact the validity of data analys…
S. Gupta, M. E. Faughnan, G. A. Tomlinson and A. M. Bayoumi	2011	A framework for applying unfamiliar trial designs in studies of rare diseases	Journal of Clinical Epidemiology	OBJECTIVE: Rare diseases may be difficult to study through conventional research methods, but are amenable to study through certain uncommonly used designs. We sought to explain these designs and to provide a framework to assist researchers in identifying the most appropriate design for a given research question. STUDY DESIGN AND SETTING: We systematically searched for literature describing rare …
B. E. Miyamoto and E. D. Kakkis	2011	The potential investment impact of improved access to accelerated approval on the development of treatments for low prevalence rare diseases	Orphanet Journal Of Rare Diseases	BACKGROUND: Over 95% of rare diseases lack treatments despite many successful treatment studies in animal models. To improve access to treatments, the Accelerated Approval (AA) regulations were implemented allowing the use of surrogate endpoints to achieve drug approval and accelerate development of life-saving therapies. Many rare diseases have not utilized AA due to the difficulty in gaining ac…
M. Puopolo and M. Pocchiari	2011	Need to improve clinical trials in rare neurodegenerative disorders	Annali Dell'Istituto Superiore di Sanita	Rare neurodegenerative diseases are fatal and no therapy is available to cure or slow down the progression of disease. We report possibly weaknesses in the management of clinical studies in these diseases, ranging from poor preclinical studies, difficulties in the recruitment of patients, delay in the onset of treatment because of lack in early disease-specific biomarkers, and suboptimal design o…
P. I. Dickson, A. R. Pariser, S. C. Groft, R. W. Ishihara, D. E. McNeil, D. Tagle, D. J. Griebel, S. G. Kaler, J. W. Mink, E. G. Shapiro, K. J. Bjoraker, L. Krivitzky, J. M. Provenzale, A. Gropman, P. Orchard, G. Raymond, B. H. Cohen, R. D. Steiner, S. F. Goldkind, R. M. Nelson, E. Kakkis and M. C. Patterson	2011	Research challenges in central nervous system manifestations of inborn errors of metabolism	Molecular Genetics & Metabolism	The Research Challenges in CNS Manifestations of Inborn Errors of Metabolism workshop was designed to address challenges in translating potential therapies for these rare disorders, and to highlight novel therapeutic strategies and innovative approaches to CNS delivery, assessment of effects and directions for the future in the treatment of these diseases. Therapies for the brain in inborn errors…
L. Abrahamyan, C. S. Li, J. Beyene, A. R. Willan and B. M. Feldman	2011	Survival distributions impact the power of randomized placebo-phase design and parallel groups randomized clinical trials	Journal of Clinical Epidemiology	OBJECTIVES: The study evaluated the power of the randomized placebo-phase design (RPPD)-a new design of randomized clinical trials (RCTs), compared with the traditional parallel groups design, assuming various response time distributions. In the RPPD, at some point, all subjects receive the experimental therapy, and the exposure to placebo is for only a short fixed period of time. STUDY DESIGN AN…
J. W. Gerss and W. Kopcke	2010	Clinical trials and rare diseases	Advances in Experimental Medicine & Biology	Whenever possible, standard methodological approaches should be applied in the design and analysis of a clinical trial that warrant adequate informative value. However, there are circumstances when the number of experimental subjects is unavoidably small. In such circumstances it is justified to consider abandoning standard statistical methodology in place of alternative approaches. Performing a …
J. C. Carey	2010	The importance of case reports in advancing scientific knowledge of rare diseases	Advances in Experimental Medicine & Biology	Case reports are defined as the scientific documentation of a single clinical observation and have a time-honored and rich tradition in medicine and scientific publication. Case reports represent a relevant, timely, and important study design in advancing medical scientific knowledge especially of rare diseases. While there are clear limitations to the methodology of case studies in determination…
M. Luisetti, I. Campo, R. Scabini, M. Zorzetto, Z. Kadija, F. Mariani and I. Ferrarotti	2010	The problems of clinical trials and registries in rare diseases	Respiratory Medicine	Clinical trials to evaluate patients affected by rare diseases are often hampered by the difficulty of recruiting a critical sample size. Registries for rare conditions are thus extremely powerful tools for overcoming recruitment problems. Here we present and discuss the international experience with alpha1-antitrypsin deficiency achieved by the Alpha One International Registry, and national expe…
B. Kinder and F. X. McCormack	2010	Clinical trials for rare lung diseases: lessons from lymphangioleiomyomatosis	Lymphatic Research & Biology	Lymphangioleiomyomatosis (LAM) is a rare, slowly progressive neoplasm that causes gradual but often life-threatening cystic destruction of the lung. Advances in our understanding of the molecular and cellular pathogenesis have LAM have identified a number of promising targets for testing in therapeutic trials. However, the design, prioritization, organization, and implementation of clinical trial…
J. H. van der Lee, J. Wesseling, M. W. Tanck and M. Offringa	2010	Sequential design with boundaries approach in pediatric intervention research reduces sample size	Journal of Clinical Epidemiology	OBJECTIVE: To estimate the difference between the number of subjects actually included in pediatric sequential trials and the sample size that would have been included with a fixed-sample design. STUDY DESIGN AND SETTING: A systematic review of pediatric sequential trials was performed. Methodological quality was assessed using a criteria list based on the CONSORT (Consolidated Standards of Repor…
A. J. Vickers and P. T. Scardino	2009	The clinically-integrated randomized trial: proposed novel method for conducting large trials at low cost	Trials [Electronic Resource]	INTRODUCTION: Randomized controlled trials provide the best method of determining which of two comparable treatments is preferable. Unfortunately, contemporary randomized trials have become increasingly expensive, complex and burdened by regulation, so much so that many trials are of doubtful feasibility. DISCUSSION: Here we present a proposal for a novel, streamlined approach to randomized trial…
S. R. Johnson, B. M. Feldman, J. E. Pope and G. A. Tomlinson	2009	Shifting our thinking about uncommon disease trials: the case of methotrexate in scleroderma	Journal of Rheumatology	OBJECTIVE: Randomized trials for uncommon diseases suffer from methodological challenges: difficulty in recruiting sufficient numbers of patients and low power to detect important treatment effects. Using traditional (frequentist) analysis, p values > 0.05 mean investigators are unable to reject the null hypothesis (of no treatment effect). The medical community often labels trials with p values …
R. C. Griggs, M. Batshaw, M. Dunkle, R. Gopal-Srivastava, E. Kaye, J. Krischer, T. Nguyen, K. Paulus, P. A. Merkel and N. Rare Diseases Clinical Research	2009	Clinical research for rare disease: opportunities, challenges, and solutions	Molecular Genetics & Metabolism	Over 7000 rare diseases, each <200,000 US residents, affect nearly 30 million people in the United States. Furthermore, for the 10% of people with a rare disease and for their families, these disorders no longer seem rare. Molecular genetics have characterized the cause of many rare diseases and provide unprecedented opportunities for identifying patients, determining phenotypes, and devising tre…
B. M. Buckley	2008	Clinical trials of orphan medicines	Lancet
S. C. Chow and M. Chang	2008	Adaptive design methods in clinical trials - a review	Orphanet Journal Of Rare Diseases	In recent years, the use of adaptive design methods in clinical research and development based on accrued data has become very popular due to its flexibility and efficiency. Based on adaptations applied, adaptive designs can be classified into three categories: prospective, concurrent (ad hoc), and retrospective adaptive designs. An adaptive design allows modifications made to trial and/or statis…
J. H. van der Lee, J. Wesseling, M. W. Tanck and M. Offringa	2008	Efficient ways exist to obtain the optimal sample size in clinical trials in rare diseases	Journal of Clinical Epidemiology	OBJECTIVE: Recruitment of pediatric patients in randomized clinical trials is hampered by the rarity of many conditions and by ethical constraints. The objective of this paper is to give an overview of design options to obtain a statistically valid result while including a minimum number of subjects. STUDY DESIGN AND SETTING: Overview and discussion of several approaches to conduct valid randomiz…
M. Behera, A. Kumar, H. P. Soares, L. Sokol and B. Djulbegovic	2007	Evidence-based medicine for rare diseases: implications for data interpretation and clinical trial design	Cancer Control	BACKGROUND: The randomized, controlled trial (RCT) is the "gold standard" for establishing the effect of any intervention. This approach, however, is often not feasible with rare diseases such as cutaneous T-cell lymphoma. METHODS: We review the principles of evidence-based medicine to see which are particularly pertinent to the study of rare diseases. RESULTS: When an RCT is not feasible, attent…
M. E. Haffner and J. V. Kelsey	1992	Evaluation of orphan products by the U.S. Food and Drug Administration	International Journal of Technology Assessment in Health Care	Orphan drug products generally are used in treating or preventing rare diseases. The small number of patients available for study may create special problems in the evaluation of these products. This paper examines some of the special problems that are associated with the design and implementation of studies to evaluate the safety and efficacy of orphan drugs. The U.S. Food and Drug Administratio…
A. Bajard, S. Chabaud, C. Cornu, A. C. Castellan, S. Malik, P. Kurbatova, V. Volpert, N. Eymard, B. Kassai and P. Nony	2016	An in silico approach helped to identify the best experimental design, population, and outcome for future randomized clinical trials	Journal of clinical epidemiology	OBJECTIVES: The main objective of our work was to compare different randomized clinical trial (RCT) experimental designs in terms of power, accuracy of the estimation of treatment effect, and number of patients receiving active treatment using in silico simulations. STUDY DESIGN AND SETTING: A virtual population of patients was simulated and randomized in potential clinical trials. Treatment effe…
E. De Blieck, H. Adams, E. Augustine, J. Cialone, L. Dure, J. Kwon, F. Marshall, N. Newhouse, K. Rose, P. Rothberg, A. Vierhile and J. Mink	2013	Methodology of clinical research in rare diseases: Development of a research program in juvenile neuronal ceroid lipofuscinosis (JNCL) via creation of a patient registry and collaboration with patient advocates	Molecular Genetics and Metabolism	Introduction: Juvenile neuronal ceroid lipofuscinosis (JNCL; Batten disease) is a rare, inherited, and fatal lysosomal storage disorder of childhood. Currently, there are no treatments for JNCL that impact the course of the disease. The University of Rochester Batten Center's (URBC) mission is to find treatments to slow, halt, or prevent JNCL. Objectives: Establish a JNCL research cohort for obse…
M. Vray, D. Girault, N. Hoog-Labouret, R. Porcher and J. C. Thalabard	2004	Methodology for small clinical trials. [French, English]		Small clinical trials are trials in which the number of patients does not enable the objective of the study to be appropriately met with the usual methodological rules. This situation is common in the case of rare diseases, in paediatrics, in certain cancer pathologies or when the number of patients exposed to the treatment needs to be limited. The principal methodological problems are initially …
B. Wilcken	2001	Rare diseases and the assessment of intervention: What sorts of clinical trials can we use?	Journal of Inherited Metabolic Disease	There is increasing emphasis on the importance of practising evidence-based medicine. Randomized controlled trials are the standard way to assess the benefits of an intervention, and observational studies are not usually accorded much weight; the results are likely to be considered misleading. For rare diseases, there are great difficulties in obtaining adequate evidence for interventions or for …
B. Feldman, E. Wang, A. Willan and J. P. Szalai	2001	The randomized placebo-phase design for clinical trials	Journal of Clinical Epidemiology	Randomized controlled trials are the criterion standard method for evaluating the effectiveness of medical treatments. There are situations, however, where the possibility of being in the control group in a randomized controlled trial is unacceptable to potential subjects or their physicians. This lack of acceptance is a reason for poor accrual. We developed and validated a new clinical trial des…
M. E. Haffner	1998	Designing clinical trials to study rare disease treatment	Drug Information Journal	This paper provides an overview of the design of clinical trials for rare diseases and the impact of the Orphan Drug Act on the successful study of diseases found in small, widely dispersed patient populations. Orphan drugs are defined. Randomized, placebo-control trials may not always be an option for studying orphan drugs; designs which may work better include: open protocol, open label, histor…
R. J. Lilford, J. G. Thornton and D. Braunholtz	1995	Clinical trials and rare diseases: A way out of a conundrum	British Medical Journal	Currently, clinical trials tend to be individually funded and applicants must include a power calculation in their grant request. However, conventional levels of statistical precision are unlikely to be obtainable prospectively if the trial is required to evaluate treatment of a rare disease. This means that clinicians treating such diseases remain in ignorance and must form their judgments solel…
J. C. Maro, J. S. Brown, G. J. Dal Pan and L. Li	2014	Orphan therapies: making best use of postmarket data	J Gen Intern Med	BACKGROUND: Postmarket surveillance of the comparative safety and efficacy of orphan therapeutics is challenging, particularly when multiple therapeutics are licensed for the same orphan indication. To make best use of product-specific registry data collected to fulfill regulatory requirements, we propose the creation of a distributed electronic health data network among registries. Such a networ…
R. N. Tamura, J. P. Krischer, C. Pagnoux, R. Micheletti, P. C. Grayson, Y. F. Chen and P. A. Merkel	2016	A small n sequential multiple assignment randomized trial design for use in rare disease research	Contemporary Clinical Trials	BACKGROUND: Clinical trials in rare diseases are difficult to conduct due to the limited number of patients available with each disorder. We developed a Phase 2 trial which is a small n sequential multiple assignment randomized trial (snSMART) design to test several treatments for a rare disease for which no standard therapy exists. PURPOSE: This paper illustrates the design, sample size estimati…
C. Y. Ponsioen, R. W. Chapman, O. Chazouilleres, G. M. Hirschfield, T. H. Karlsen, A. W. Lohse, M. Pinzani, E. Schrumpf, M. Trauner and G. J. Gores	2016	Surrogate endpoints for clinical trials in primary sclerosing cholangitis: Review and results from an International PSC Study Group consensus process	Hepatology	UNLABELLED: Primary sclerosing cholangitis (PSC) is a rare, but serious, cholestatic disease for which, to date, no effective therapy exists to halt disease progression toward end-stage liver disease. Clinical trial design to study drugs that improve prognosis is hampered by the relatively low event rate of clinically relevant endpoints. To overcome this shortcoming, there is an urgent need to id…
B. K. Potter, S. D. Khangura, K. Tingley, P. Chakraborty and J. Little	2016	Translating rare-disease therapies into improved care for patients and families: what are the right outcomes, designs, and engagement approaches in health-systems research?	Genetics in Medicine	There is a need for research to understand and improve health systems for rare diseases in order to ensure that new, efficacious therapies developed through basic and early translational science lead to real benefits for patients. Such research must (i) focus on appropriate patient-oriented outcomes, (ii) include robust study designs that can accommodate real-world decision priorities, and (iii) …
Hollak, C E, Aerts, J M, Ayme, S, Manuel, J	2011	Limitations of drug registries to evaluate orphan medicinal products for the treatment of lysosomal storage disorders	Orphanet J Rare Dis	Orphan drugs are often approved under exceptional circumstances, requiring submission of additional data on safety and effectiveness through registries. These registries are mainly focused on one drug only and data is frequently incomplete. Some registries also address phenotypic heterogeneity and natural history data and publications on these aspects have contributed to the knowledge and awarene…
Kwakkenbos L, Jewett LR, Baron M, et al.	2013	The Scleroderma Patient-centered Intervention Network (SPIN) Cohort: protocol for a cohort multiple randomised controlled trial (cmRCT) design to support trials of psychosocial and rehabilitation interventions in a rare disease context	BMJ Open	INTRODUCTION: Psychosocial and rehabilitation interventions are increasingly used to attenuate disability and improve health-related quality of life (HRQL) in chronic diseases, but are typically not available for patients with rare diseases. Conducting rigorous, adequately powered trials of these interventions for patients with rare diseases is difficult. The Scleroderma Patient-centered Interven…
Lachmann R, Schoser B	2013	The clinical relevance of outcomes used in late-onset Pompe disease: can we do better?	Orphanet J Rare Dis	Pompe disease/glycogen storage disease type II, is a rare, lysosomal storage disorder associated with progressive proximal myopathy, causing a gradual loss of muscular function and respiratory insufficiency. Studies of patients with late-onset Pompe disease have used endpoints such as the 6-minute walking test (6MWT) and forced vital capacity (FVC) to assess muscular and respiratory function duri…
Richesson R, Vehik K.	2010	Patient registries: Utility, Validity, and Inference	Advances in Experimental Medicine & Biology	Patient registries are essential tools for public health surveillance and research inquiry, and are a particularly important resource for understanding rare diseases. Registries provide consistent data for defined populations and can support the study of the distribution and determinants of various diseases. One advantage of registries is the ability to observe caseload and population characteris…
Jones S, James E, Prasad S.	2011	Disease registries and outcomes research in children: Focus on lysosomal storage disorders.	Pediatr Drugs	Assessing medicines specifically for use in children has been neglected in the past, with the majority of formal clinical studies being conducted in adults. Clinical trials are a pivotal part of the drug approval process; however, they are not always applicable to the diverse populations - including children - that receive the drug after approval. They may not be the most informative assessment t…
Richesson R, Shereff D, Andrews J.	2010	[RD] PRISM Library: Patient Registry Item Specifications and Metadata for Rare Diseases	J Libr Metadata	Patient registries are important for understanding the causes and origins of rare diseases and estimating their impact; and they may prove critical to the development of new diagnostics and therapeutics. This paper introduces the [RD] PRISM resource (http://rdprism.org), a project funded by the National Institutes of Health to develop a library of standardized question-and-answer sets to support …
Unkel S, Rover C, Stallard N, Benda N, Posch M, Zohar S, et al.	2016	Systematic reviews in paediatric multiple sclerosis and Creutzfeldt-Jakob disease exemplify shortcomings in methods used to evaluate therapies in rare conditions.	Orphanet J Rare Dis	BACKGROUND: Randomized controlled trials (RCTs) are the gold standard design of clinical research to assess interventions. However, RCTs cannot always be applied for practical or ethical reasons. To investigate the current practices in rare diseases, we review evaluations of therapeutic interventions in paediatric multiple sclerosis (MS) and Creutzfeldt-Jakob disease (CJD). In particular, we shed…
Cornu C, Kassai B, Fisch R, Chiron C, Alberti C, Guerrini R, et al.	2013	Experimental designs for small randomised clinical trials: an algorithm for choice.	Orphanet J Rare Dis	BACKGROUND: Small clinical trials are necessary when there are difficulties in recruiting enough patients for conventional frequentist statistical analyses to provide an appropriate answer. These trials are often necessary for the study of rare diseases as well as specific study populations e.g. children. It has been estimated that there are between 6,000 and 8,000 rare diseases that cover a broa…
Korn EL, McShane LM, Freidlin B.	2013	Statistical Challenges in the Evaluation of Treatments for Small Patient Populations.	Sci Transl Med	The development of a new treatment typically involves evaluation of its efficacy in a large clinical trial in which patients are randomly assigned either the new treatment or the standard of care. Results from these large randomized clinical trials allow for a definitive and unbiased assessment of the clinical benefit of the new treatment over the standard one. For rare diseases or for small pati…
